# Supplementary material for: Association of diabetes and tuberculosis: impact on treatment and post-treatment outcomes
Source: HighWire-hosted journal article supplement (doi:10.1136/thoraxjnl-2012-201756), 2012-12-18
Supplement: thoraxjnl-2012-201756supp_tables.pdf [file thoraxjnl-2012-201756supp_tables.pdf]

Supplementary Table 1: Characteristics of patients with pulmonary TB, with and without chest-X ray. Orizaba, Veracruz, Mexico, 1995-2010.

| Characteristics                                         | Total             | Without X ray   | With X ray       | p value* |
|---------------------------------------------------------|-------------------|-----------------|------------------|----------|
|                                                         | n/Total (%)       | n/Total (%)     | n/Total (%)      |          |
| Previous diagnosis of diabetes                          | 374/1262 (29.64.) | 61/189 (32.28)  | 313/1073 (29.17) | 0.389    |
| Male                                                    | 730/1262 (57.84)  | 116/189 (61.38) | 614/1073 (57.22) | 0.286    |
| Age (Years, mean, S.D.)                                 | 44.68(0.19)       | 44.6(0.20)      | 45.27(0.55)      | 0.386†   |
| More than 6 years of formal schooling                   | 846/1260 (67.14)  | 113/188 (60.11) | 733/1072 (68.38) | 0.026    |
| Household with earthen floor                            | 267/1184 (22.55)  | 29/123 (23.58)  | 238/1061 (22.43) | 0.774    |
| Rural residence                                         | 148/1232 (12.01)  | 31/180 (17.22)  | 117/1052 (11.12) | 0.02     |
| Distance to nearest health centre (Meters, median, IQR) | 705(424-1055)     | 665(319-1086)   | 710(439-1053)    | 0.055‡   |
| Access to Social Security                               | 451/1262 (35.74)  | 51/189 (26.98)  | 400/1073 (37.28) | 0.006    |
| More than 10 drinks per week                            | 263/1150 (22.87)  | 216/975 (22.15) | 47/175 (26.86)   | 0.173    |
| More than 10 cigarettes per week                        | 88/1150 (7.65)    | 76/976 (7.79)   | 12/174 (6.90)    | 0.684    |

|                                              |                   |                 |                  |       |
|----------------------------------------------|-------------------|-----------------|------------------|-------|
|                                              |                   |                 |                  |       |
| Usage of illegal drugs                       | 64/1261 (5.08)    | 10/188 (5.32)   | 54/1073 (5.03)   | 0.869 |
| Homelessness or residing in shelters         | 46/1257 (3.66)    | 3/187 (1.60)    | 43/1070 (4.02)   | 0.105 |
| BCG scar                                     | 597/1257 (47.49)  | 103/186 (55.38) | 494/1071 (46.13) | 0.02  |
| HIV infection                                | 24/1228 (1.95)    | 6/174 (3.45)    | 18/1054 (1.71)   | 0.124 |
| Previous TB treatment                        | 1108/1261 (87.87) | 173/189 (91.53) | 935/1072 (87.22) | 0.094 |
| More than 10 bacilli per oil immersion field | 300/1262 (23.77)  | 51/189 (26.98)  | 249/1073 (23.21) | 0.261 |
| Drug resistance to any drug                  | 190/919 (20.67)   | 18/98 (18.37)   | 172/821 (20.95)  | 0.551 |
| Joint resistance to isoniazid and rifampin   | 43/919 (4.68)     | 3/98 (3.06)     | 40/821 (4.87)    | 0.422 |
| Unique fingerprint                           | 191/1013 (18.85)  | 24/142 (16.90)  | 167/871 (19.17)  | 0.521 |
| Fever                                        | 905/1259 (71.88)  | 137/189 (72.49) | 768/1070 (71.78) | 0.841 |
| Hemoptysis                                   | 423/1257 (33.65)  | 59/187 (31.55)  | 364/1070 (34.02) | 0.51  |

TB= Tuberculosis; HIV= Human Immunodeficiency Virus; SD.= Standard deviation; IQR = Interquartile range \* Chi square, †

Student's t-test, ‡Mann-Whitney test

Supplementary Table 2: Association of DM (including 374 patients with a previous DM medical diagnosis and 26 patients who were unaware of their DM diagnosis until after TB was diagnosed) with selected clinical manifestations and treatment outcomes among patients with pulmonary TB by multivariate analyses.

| Variable                         | Cavities in chest X-ray<br>odds ratio*<br>(95% CI)<br>n=971 | Sputum conversion<br>≥60 days<br>odds ratio*<br>(95% CI)<br>n=641 | Treatment failure<br>odds ratio*<br>(95% CI)<br>n=715*** | Recurrence<br>hazard ratio†<br>(95% CI)<br>n=784 | Relapse<br>hazard ratio†<br>(95% CI)<br>n=731 |
|----------------------------------|-------------------------------------------------------------|-------------------------------------------------------------------|----------------------------------------------------------|--------------------------------------------------|-----------------------------------------------|
| Diabetes                         | 1.86<br>(1.39-2.48) ‡                                       | 1.47<br>(1.06-2.03) **                                            | 2.96<br>(1.14-7.66) **                                   | 2.05<br>(1.26-3.34) ¶                            | 2.27<br>(1.26-4.10) ¶                         |
| Men                              | ---                                                         | ---                                                               | 2.99<br>(1.02-8.84) **                                   | ---                                              | ---                                           |
| More than 10 cigarettes per week | ---                                                         | ---                                                               | ---                                                      | ---                                              | 3.28<br>(1.61-6.70) ¶                         |

|                                                      |                       |                        |                           |                        |                         |
|------------------------------------------------------|-----------------------|------------------------|---------------------------|------------------------|-------------------------|
| Previous TB treatment                                | ---                   | ---                    | 4.16<br>(1.52-11.38) ¶    | ---                    | ---                     |
| Time elapsed between onset of symptoms and treatment | ---                   | 1.01<br>(1.00-1.01)**  | ---                       | ---                    | ---                     |
| More than 10 bacilli per oil immersion field         | 2.18<br>(1.61-2.97) ‡ | ---                    | ---                       | ---                    | 1.93<br>(1.02-3.63) **  |
| Joint resistance to isoniazid and rifampin           | ---                   | 5.90<br>(1.65-21.02) ¶ | 33.38<br>(10.34-107.77) ‡ | 10.1<br>(5.09-20.04) ‡ | 12.41<br>(4.27-36.03) ‡ |
| Failure or abandon                                   |                       | ---                    | ---                       | 2.4<br>(2.40-8.55) ‡   | ---                     |
| HIV infection                                        | 0.29<br>(0.06-1.32) § | ---                    | ---                       | 2.57<br>(0.35-18.69) § | ---                     |
| Body mass index                                      | 0.95<br>(0.91-0.98) ¶ | ---                    | ---                       | ---                    | ---                     |

TB = Tuberculosis; DM = Diabetes mellitus; HIV= Human Immunodeficiency Virus; \* Unconditional logistic regression model; † Cox proportional hazard model; ‡ <0.001; § NS; ¶ <0.01; \*\*<0.05. \*\*\* Patients who failed were compared with patients who cured or completed treatment. --- Variable not included in the final model.
